# Supplementary material for: Preparation of mesoporous chitosan cobalt supported nano-catalyst for the catalyzed reduction of quinoline to quinoline aldehyde
Source: Research Square preprint supplement (doi:10.21203/rs.3.rs-5391338/v1), 2024-11-29
Supplement: Supplementary file 1 [file a31fb04712d727c2bf4ce539.docx]

**Table 1**

Optimization of transfer hydrogenation conditions of quinolone over Co-catalyst.a


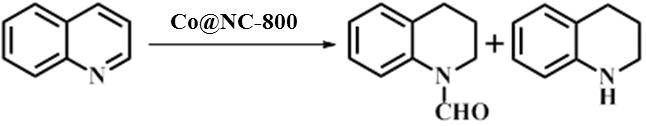


| Entry | Catalyst | Mass (mg) | Solvent | Time  (h) | Conv. b  (%) | Sel. b  (%) | TOFg  (h-1) |
| --- | --- | --- | --- | --- | --- | --- | --- |
| 1 | Co@NC-700 | 50 | toluene | 12 | 3 | 99 | 1.07 |
| 2 | Co@NC-800 | 50 | toluene | 12 | 100 | 99 | 2.53 |
| 3 | Co@NC-900 | 50 | toluene | 12 | 38 | 99 | 1.73 |
| 4 c | Co@NC-800 | 50 | toluene | 12 | 12 | 99 | 0.31 |
| 5 d | Co@NC-800 | 50 | toluene | 12 | 76 | 99 | 1.92 |
| 6 | Co@NC-800 | 50 | methanol | 12 | trace | - | - |
| 7 | Co@NC-800 | 50 | ethanol | 12 | 11% | 72 | 0.20 |
| 8 | Co@NC-800 | 50 | water | 12 | 31 | 90 | 0.72 |
| 9 | Co@NC-800 | 30 | toluene | 12 | 94 | 99 | 2.38 |
| 10 | Co@NC-800 | 10 | toluene | 12 | 87 | 99 | 2.20 |
| 11 | Co@NC-800 | 0 | toluene | 12 | trace | - | - |
| 12 e | Co@NC-800 | 50 | toluene | 12 | trace | - | - |
| 13 | NC-800 | 50 | toluene | 12 | trace | - | - |
| 14f | Co@NC-800 | 50 | toluene | 12 | trace | - | - |

a Reaction conditions: quinoline (0.25 mmol), catalyst (0.96 wt % Co), 130 oC, 12h, toluene (3ml), 20 eq. HCOOH; b Determined by GC-MS; c 0.45 wt % Co; d 0.59% wt % Co; e 0 eq. HCOOH; f adding 0.2 mmol KSCN; g TOF = [moles of converted substrate] × [(moles of Co) × (reaction time in h)]-1.

**Table 2**

Co@NC-800 catalyst catalytic transfer hydrogenation of quinoline to generate the corresponding N-formyltetrahydroquinoline.a

| Entry | Substrate | Product | Time (h) | Conv. (%) b | Sel. (%)b |
| --- | --- | --- | --- | --- | --- |
| 1 |  |  | 12 | 100 | 99 |
| 2 |  |  | 12 | 98 | 99 |
| 3 |  |  | 24 | 85 | 99 |
| 4 |  |  | 24 | 91 | 53 |
| 5 |  |  | 24 | 73 | 99 |
| 6 |  |  | 24 | 92 | 89 |
| 7 |  |  | 24 | 74 | 73 |
| 8 |  |  | 24 | 99 | 99 |
| 9 |  |  | 24 | 79 | 99 |
| 10 |  |  | 24 | 97 | 76 |
| 11 |  |  | 24 | 80 | 99 |

a Reaction conditions: substrate (0.25 mmol), 20 eq. HCOOH, 3 mL toluene, 50 mg catalyst (0.95 wt %), 110 oC, b Determined by GC-MS.
