# Supplementary material for: Preparation of mesoporous chitosan cobalt supported nano-catalyst for the catalyzed reduction of quinoline to quinoline aldehyde
Source: Research Square preprint supplement (doi:10.21203/rs.3.rs-5391338/v1), 2024-11-29
Supplement: Supplementary file 2 [file df87ee469ab270bbfee39de9.docx]

**Supporting information**


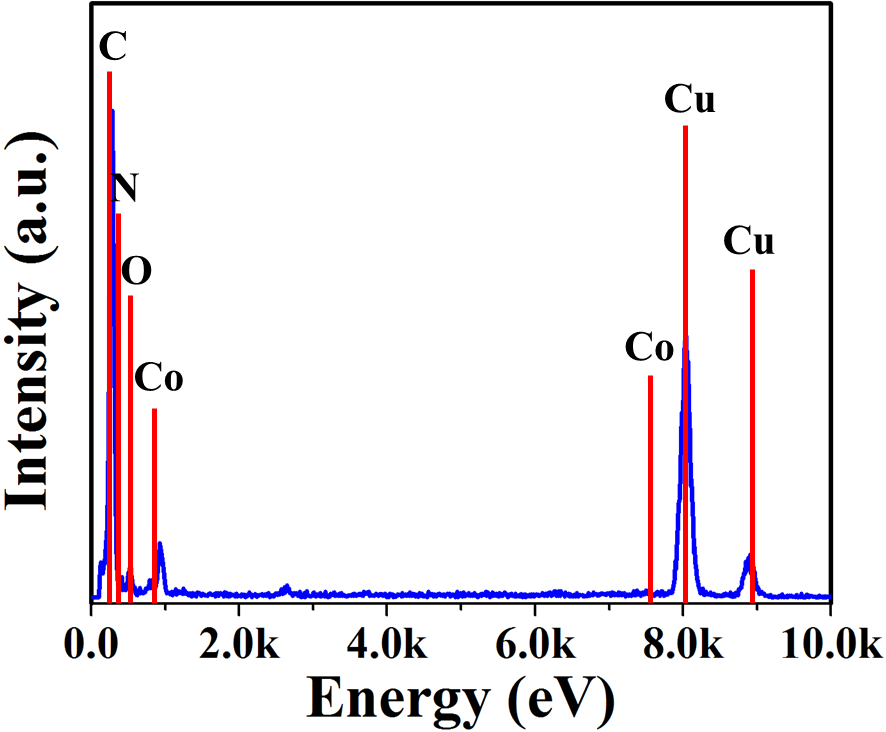


**Fig. S1** EDX spectrum of Co@NC-800 catalyst.


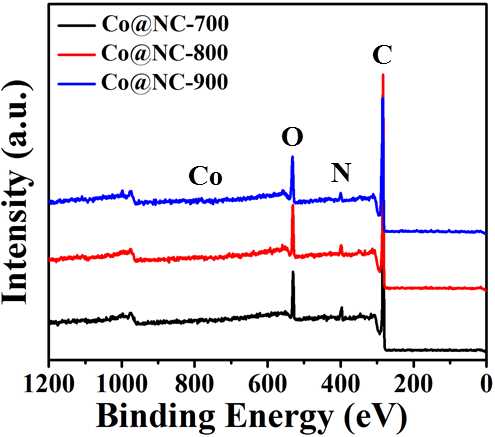


**Fig. S2.** The wide-range XPS spectrum of Co@NC-T samples.


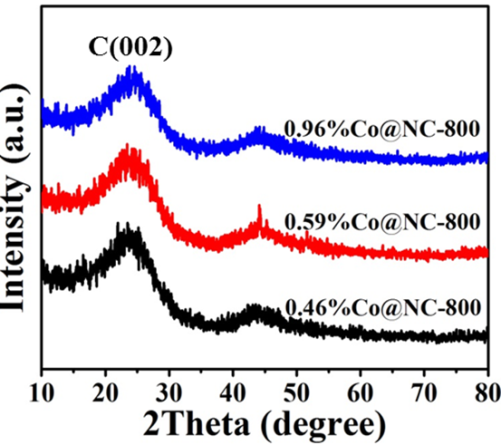


**Fig. S3.** XRD spectra of different cobalt content of Co@NC-800 catalysts


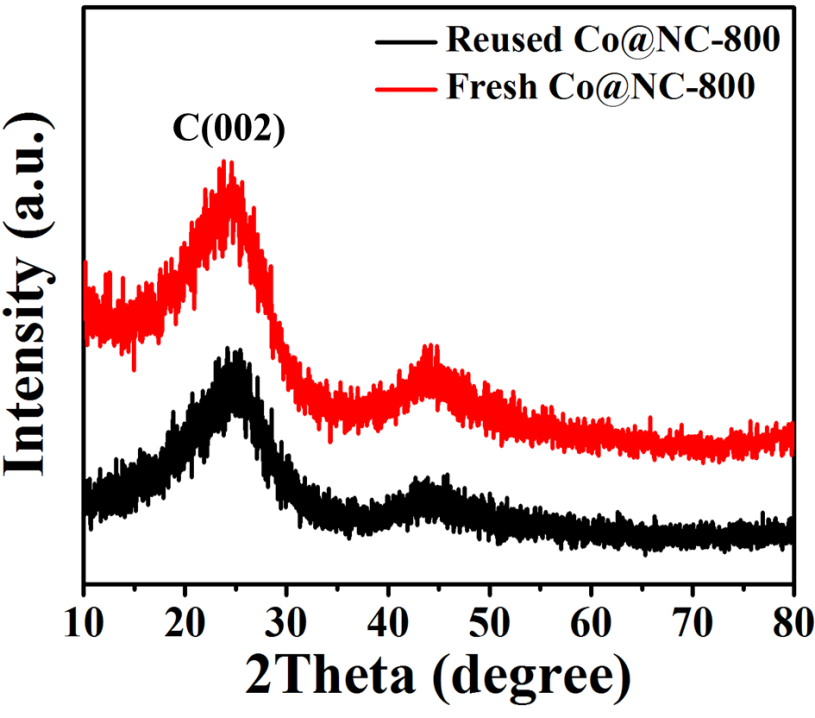


**Fig. S4.** XRD spectra of fresh and reused Co@NC-800 catalyst.

**Table S1**

Elemental analysis results of catalyst under different pyrolysis temperature.

| Sample | N  (wt. %) | C  (wt. %) | H  (wt. %) |
| --- | --- | --- | --- |
| Co@NC-700 | 9.15 | 81.30 | 1.04 |
| Co@NC-800 | 8.19 | 82.34 | 1.74 |
| Co@NC-900 | 7.17 | 85.00 | 0.55 |

**Table S2**

The Co content of Co@NC-T catalysts.

| Sample | Co |
| --- | --- |
| Co@NC-700 | 0.69 |
| Co@NC-800 | 0.96 |
| Co@NC-900 | 0.54 |
| 1Co@NC-800 | 0.46 |
| 2Co@NC-800 | 0.59 |

**Table S3**

Structure parameters of Co@NC-T catalysts.

| Catalyst | Surface area | Pore size | Pore volume |
| --- | --- | --- | --- |
| Co@NC | 209.06 | 1.96 | 0.10 |
| Co@NC-800 | 268.19 | 1.78 | 0.12 |
